# Supplementary material for: Propidium Monoazide (PMAxx)-Recombinase Polymerase Amplification Exo (RPA Exo) Assay for Rapid Detection of Burkholderia cepacia Complex in Chlorhexidine Gluconate (CHX) and Benzalkonium Chloride (BZK) Solutions
Source: MDPI journal article supplement (doi:10.3390/microorganisms11061401), 2023-05-26
Supplement: s1 [file s1]

SUPPLEMENTARY MATERIAL

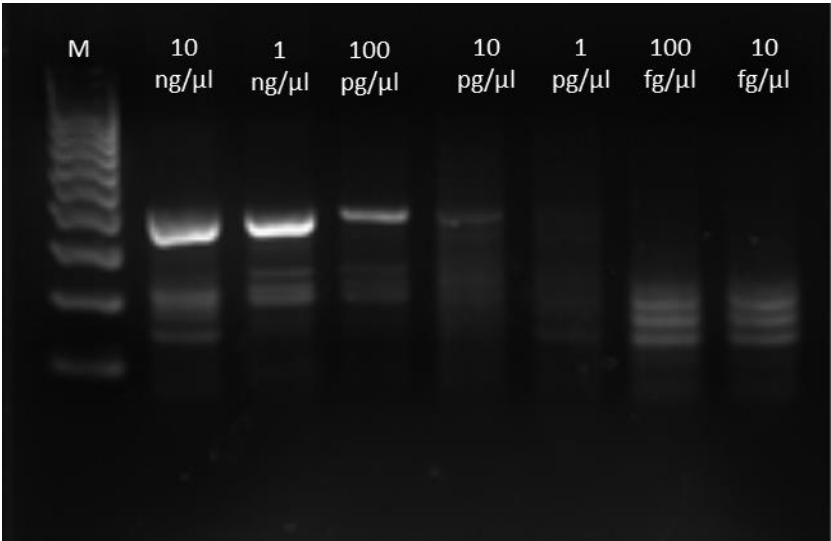

Figure S1: Sensitivity analysis of *B. cenocepacia* J2315 by PMAxx-RPA exo assay with agarose gel electrophoresis. DNA samples (94.3 ng/μl) were spectrophotometrically determined at A260 and using 10-fold serial diluted genomic DNA (approx. 10 ng/μL, 1 ng/μL, 100 pg/μL, 10 pg/μL, 1 pg/μL, and 100 fg/μL) of *B. cenocepacia* J2315.

Table S1. Sequence information of the cluster 3558

| No. of cluster | ID | Size | Start | Stop | Sequence                                 | Consensus sequence                                                                                                                                                                                                                                                                                                                                                                                                                                                                                                                                                                                                                                                                                                                                                                                                                                                                                                                                                 |
|----------------|----|------|-------|------|------------------------------------------|--------------------------------------------------------------------------------------------------------------------------------------------------------------------------------------------------------------------------------------------------------------------------------------------------------------------------------------------------------------------------------------------------------------------------------------------------------------------------------------------------------------------------------------------------------------------------------------------------------------------------------------------------------------------------------------------------------------------------------------------------------------------------------------------------------------------------------------------------------------------------------------------------------------------------------------------------------------------|
| 3558           | 1  | 26   | 283   | 309  | ACGCTGTCGTCGACGA<br>TCATCAGCCT           | ATGCTCTGAAATXATTCCXCTCGGXXXXTGGGTCGACCCXXXCGTXCAXTAXXTXCTXGA<br>XCAXGAXGCXXXXACXTTCGAXXCGXTXGGXCXXGCGATCGAXXGXTXGCXGCXXTX<br>XTCGAXCAXXGXTXCCAGCXXTXCCGATGTGGXTGTGTATGGCXXTCTTCATCGGXXT<br>XGGXXTGTGGCGXTXGGCTGGCGXTTXGCXXTGTXXXXACXXXTCXXTXCTXCTGA<br>TXXTXGCXACXGGTTCTGGGAXCAGACXXTXATXACGCTXGGXCTXACGCTGTCGTC<br>GACGATCATCAGCCTXGXGCTXGGCATXCCGCTCGGCXTCTGGGCXGCXAAGACAA<br>XXGGTXGCXGCXXXXTTCGXCXCGXTXCTXGAXXTGATGCAACGATGCCXGCXTTCGT<br>XTAXCTGATTCCGGCXGCXATGXTGTTCGGXCTXGGXCGXTGCCXGGXATCCTGTCGA<br>CGGTGATCTTCGCGATGCGGCCXGCXGTGCGXTXACGAGCCTXGGXATXCGXCAXG<br>TGAAXCGXGAGATXGTCGAXGCXGGXCAGGCXTTXGGXTGXACGCCXTGGCAXXTXCT<br>XTACAAXGTXCAXTTXCCGAAXGCGXTGCCGTCGATCATGCAAGGXTXAACAGACG<br>ATCATGATGGCGCTGTCGATGGTATCATXGCXTCGATGGTGGXGCXGGCGGXTXG<br>GCAACGAXGTGCTXGCXAGXATCCAGCGXTXGAXATCGGXTXGGXTTCGAXAGCGG<br>XXTGTGCGTGTGTGCTXGCGATCATXCTXGAXCGXATCACCAXAGCTTXXGGXCGXG<br>CXCCXGGXXCXXXXXGCXCCGXTTTCXCGGXTXAAGCAXXTXXTXCGXXXXAA<br>XXXXXXXXXXCAXGCXTXA |
|                | 2  | 32   | 460   | 492  | ATCCTGTCGACGGTGA<br>TCTTCGCGATGCCGCC     |                                                                                                                                                                                                                                                                                                                                                                                                                                                                                                                                                                                                                                                                                                                                                                                                                                                                                                                                                                    |
|                | 3  | 32   | 634   | 666  | AACCAGACGATCATG<br>ATGGCGCTGTCGATGG<br>T |                                                                                                                                                                                                                                                                                                                                                                                                                                                                                                                                                                                                                                                                                                                                                                                                                                                                                                                                                                    |
